# Supplementary material for: Chlorinated solvent degradation in groundwater by green rust–bone char composite: solute interactions and chlorinated ethylene competition
Source: Royal Society of Chemistry journal article supplement (doi:10.1039/d1ew00484k), 2021-01-01
Supplement: d1ew00484k1.pdf [file d1ew00484k1.pdf]

Chlorinated solvent degradation in groundwater  
by green rust - bone char composite: solute interactions and  
chlorinated ethylene competition

Jing Ai <sup>a\*</sup>, Dominique J. Tobler <sup>a</sup>, Cecilie Gry Duncan-Jones <sup>a</sup>, Maria Eckardt Manniche <sup>a</sup>, Kirstine Evald  
Andersson<sup>a</sup>, Hans Christian B. Hansen <sup>a</sup>

<sup>a</sup> Department of Plant and Environmental Sciences, University of Copenhagen, Thorvaldsensvej 40, DK-  
1871 Frederiksberg C, Denmark

**\*Corresponding author (Jing Ai): E-mail address: [jingai@plen.ku.dk](mailto:jingai@plen.ku.dk)**

**Content of this supporting information**

This supporting information contains additional details on methods and additional data and figures to  
support the interpretation made in the results and discussion section. In total, this SI includes 11 pages  
with 7 figures, and 3 tables.

## 17 **Text S1. Synthesis of GR<sub>SO4</sub> and GR<sub>CO3</sub>**

18 Syntheses of GR<sub>SO4</sub> and GR<sub>CO3</sub> followed similar procedures as the GR<sub>Cl</sub> synthesis by Yin et al. (1). For  
19 GR<sub>SO4</sub>, 20 mL of 0.5 M FeSO<sub>4</sub> solution was added to 400 mL of 70 mM glycine inside a glass flask under  
20 continuous stirring (300 rpm) with the pH kept constant at 8.0 (T ~ 22 °C) by titration with 1 M NaOH  
21 using a pH-stat (Metrohm, 719 Titrino). After, 20 mL of 0.1 M Fe<sub>2</sub>(SO<sub>4</sub>)<sub>3</sub> solution was injected into the  
22 synthesis flask using a 20 mL plastic syringe at a speed of 5 ml min<sup>-1</sup>. The suspension was stirred for  
23 another 5 min when titration terminated. GR<sub>CO3</sub> synthesis was performed identical to that of GR<sub>Cl</sub>  
24 synthesis except that pH was kept constant by titration with 1.0 M NaCO<sub>3</sub> instead of 1.0 NaOH. The  
25 freshly synthesized suspensions were briefly washed by two rounds of centrifugation and re-suspension  
26 in deoxygenated triple-deionized water as done for GR<sub>Cl</sub>. The washed GR was re-suspended in 100 ml  
27 deoxygenated triple-deionized water and stirred on a magnetic stirrer at 500 rpm for 10 min prior to  
28 usage.

29

31 **Text S2. Calculation of reducing capacity of GR<sub>Cl</sub>**

32 In triple CE experiments with 23 mM [Fe(II)]<sub>GR</sub> and 0.15 g L<sup>-1</sup> BC, the reducing capacity of GR<sub>Cl</sub> is 7.6 mM  
33 e<sup>-</sup> assuming that GR transforms into magnetite during CE dechlorination as observed in our previous  
34 study (2). Initial CE concentrations were 20 μM for PCE, TCE and cDCE, respectively, thus full degradation  
35 of all added CEs requires 280 μM electron equivalents (6\*20 + 4\*20 + 4\*20) according to Eq.S1-S3. In  
36 this case, the reducing capacity of GR was 27-fold higher than the oxidation equivalents of CEs.

37

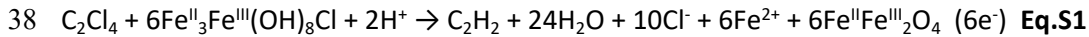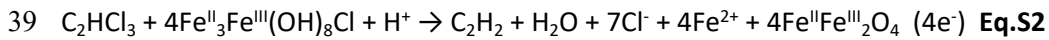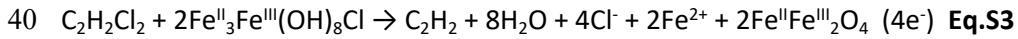

41

42 The highest CE concentration was measured in GW-C, where the initial PCE concentration (127 μM) was  
43 the highest among all the tested groundwaters, and TCE (10 μM) and cDCE (19 μM) were much lower. In  
44 this case, full dechlorination of all CEs would require 0.88 mM e<sup>-</sup>, which is still 6.4-fold lower than the  
45 reducing capacity provided by the added GR (17 mM [Fe(II)]<sub>GR</sub>, i.e., 5.7 mM e<sup>-</sup>). Therefore, we believe  
46 that the observed inhibition of cDCE reduction in mixed CE systems cannot be due to insufficient GR  
47 reducing capacity.

48

50 **Table S1. Summary of TCE dechlorination rates ( $k_{mass}$ , L g<sup>-1</sup> h<sup>-1</sup>) in the presence of groundwater solutes**  
 51 **and comparison to  $k_{mass}$ (TCE) in TI water shown by a decrease factor given in brackets <sup>a</sup>.**

| Solutes                         | 0.5 mM                     | 1.0 mM                     | 2.0/5.0 mM                       | 10 mM                      |
|---------------------------------|----------------------------|----------------------------|----------------------------------|----------------------------|
| Cl <sup>-</sup>                 |                            |                            |                                  | 0.76 ± 0.04 ( <b>1.4</b> ) |
| SO <sub>4</sub> <sup>2-</sup>   |                            | 1.11 ± 0.05 ( <b>1.0</b> ) |                                  | 0.86 ± 0.04 ( <b>1.3</b> ) |
| HCO <sub>3</sub> <sup>-</sup>   |                            | 1.17 ± 0.05 ( <b>0.9</b> ) | 5 mM: 0.39 ± 0.02 ( <b>2.8</b> ) | 0.16 ± 0.01 ( <b>6.7</b> ) |
| H <sub>4</sub> SiO <sub>4</sub> | 0.65 ± 0.05 ( <b>1.7</b> ) | 0.65 ± 0.07 ( <b>1.7</b> ) | 2 mM: 0.21 ± 0.04 ( <b>5.3</b> ) |                            |

52 <sup>a</sup>  $k_{mass}$ (TCE) in TI water is 1.09 ± 0.06 L g<sup>-1</sup> h<sup>-1</sup>, and fresh BC was used in this set of experiments. The  
 53 decrease factors in brackets were obtained by dividing  $k_{mass}$ (TCE) in the reaction with TI water with  
 54 measured  $k_{mass}$ (TCE) in corresponding solutions.

55

**Table S2. Summary of CE dechlorination rate ( $k_{mass}$ , L g<sup>-1</sup> h<sup>-1</sup>) in competition experiments and comparison to  $k_{mass}$ (CE) in single CE experiment with TI water shown by a decrease factor given in brackets <sup>a</sup> (unless stated otherwise).**

| Experimental setups     | BC status | $k_{mass}$ (PCE)                       | $k_{mass}$ (TCE)                        | $k_{mass}$ (cDCE)           |
|-------------------------|-----------|----------------------------------------|-----------------------------------------|-----------------------------|
| Single CE (TI)          | Stored    | 0.8 ± 0.1                              | 0.52 ± 0.03 ( <b>2.1</b> ) <sup>b</sup> | 0.14 ± 0.01                 |
| Single CE (GW)          | Stored    | 0.14 ± 0.01( <b>5.2</b> )              | 0.20 ± 0.02 ( <b>2.6</b> )              | 0.025 ± 0.07 ( <b>5.6</b> ) |
| PCE + TCE (TI)          | Stored    | 0.45 ± 0.02( <b>1.8</b> )              | 0.32 ± 0.02 ( <b>1.6</b> )              | n.a. <sup>c</sup>           |
| TCE + cDCE (TI)         | Stored    | n.a. <sup>c</sup>                      | 0.61 ± 0.04 ( <b>0.85</b> )             | - <sup>d</sup>              |
| PCE + cDCE (TI)         | Stored    | 0.77 ± 0.04( <b>1.0</b> )              | n.a. <sup>c</sup>                       | - <sup>d</sup>              |
| PCE + TCE + cDCE (TI)   | Stored    | 0.32 ± 0.05( <b>2.5</b> )              | 0.20 ± 0.03 ( <b>2.6</b> )              | - <sup>d</sup>              |
| PCE + TCE + cDCE (GW-F) | Stored    | 0.22 ± 0.01( <b>1.5</b> ) <sup>e</sup> | 0.16 ± 0.01 ( <b>1.3</b> ) <sup>e</sup> | - <sup>d</sup>              |

<sup>a</sup> Decrease factors in brackets were obtained by comparing to the corresponding single CE experiments with stored BC, i.e., the values in the first row;

<sup>b</sup> The decrease factor in brackets was calculated by dividing the  $k_{mass}$ (TCE) obtained in the single TCE experiment in TI water in **Experiment a** ( $1.09 \pm 0.06$  L g<sup>-1</sup> h<sup>-1</sup>; Table 1) with the here measured  $k_{mass}$ (TCE) (i.e., **Experiment b**) to show the impact of BC storage time;

<sup>c</sup> No data;

<sup>d</sup> No clear sign of cDCE degradation as cDCE data was not significantly different from control data;

<sup>e</sup> Decrease factors in brackets were obtained by dividing CE  $k_{mass}$  in triple CE experiments in TI water with the corresponding  $k_{mass}$  value in the CE-spiked clean groundwater, GW-F.

**Table S3. Summary of CE dechlorination rate ( $k_{mass}$ , L g<sup>-1</sup> h<sup>-1</sup>) in contaminated groundwaters and comparison to triple CE experiments with CE-spiked clean groundwater shown by a decrease factor given in brackets <sup>a</sup> (unless stated otherwise).**

| Groundwater | BC status | $k_{mass}$ (PCE)                      | $k_{mass}$ (TCE)                            | $k_{mass}$ (cDCE) |
|-------------|-----------|---------------------------------------|---------------------------------------------|-------------------|
| GW-A        | Fresh     | n.a. <sup>b</sup>                     | 0.048 ± 0.005 <b>(3.3/7.0)</b> <sup>d</sup> | n.a. <sup>b</sup> |
| GW-B        | Fresh     | 0.06 ± 0.01 <b>(3.7)</b> <sup>c</sup> | - <sup>e</sup>                              | - <sup>e</sup>    |
| GW-C        | Fresh     | 0.10 ± 0.02 <b>(2.2)</b> <sup>c</sup> | - <sup>e</sup>                              | - <sup>e</sup>    |
| GW-D        | Fresh     | 0.035 ± 0.007 <b>(6.3)</b>            | 0.050 ± 0.007 <b>(3.2/6.7)</b> <sup>d</sup> | - <sup>e</sup>    |
| GW-E        | Fresh     | 0.033 ± 0.004 <b>(6.7)</b>            | 0.021 ± 0.003 <b>(7.6/16)</b> <sup>d</sup>  | - <sup>e</sup>    |

<sup>a</sup> Decrease factors were calculated by dividing the  $k_{mass}$  (CE) obtained in triple CE experiments with GW-F with the corresponding  $k_{mass}$  in CE contaminated groundwaters;

<sup>b</sup> PCE and cDCE were not detected in GW-A;

<sup>c</sup> The data were fitted by a modified first-order kinetic model ( $M_t = b \times e^{-k \times t} + a$ ) with 'a' as an offset because the reaction substantially slowed at the end of the monitored time frame without reaching full CE degradation. Thus, "a" refers to the fraction of contaminants that remained at the end of the reaction;

<sup>d</sup> Both decrease factors refer to the comparison to the CE-spiked clean groundwater, but the value on the right includes correction for the BC aging effect (a further 2.1-fold decrease for TCE reduction, Table S2).

<sup>e</sup> No clear signs of degradation.

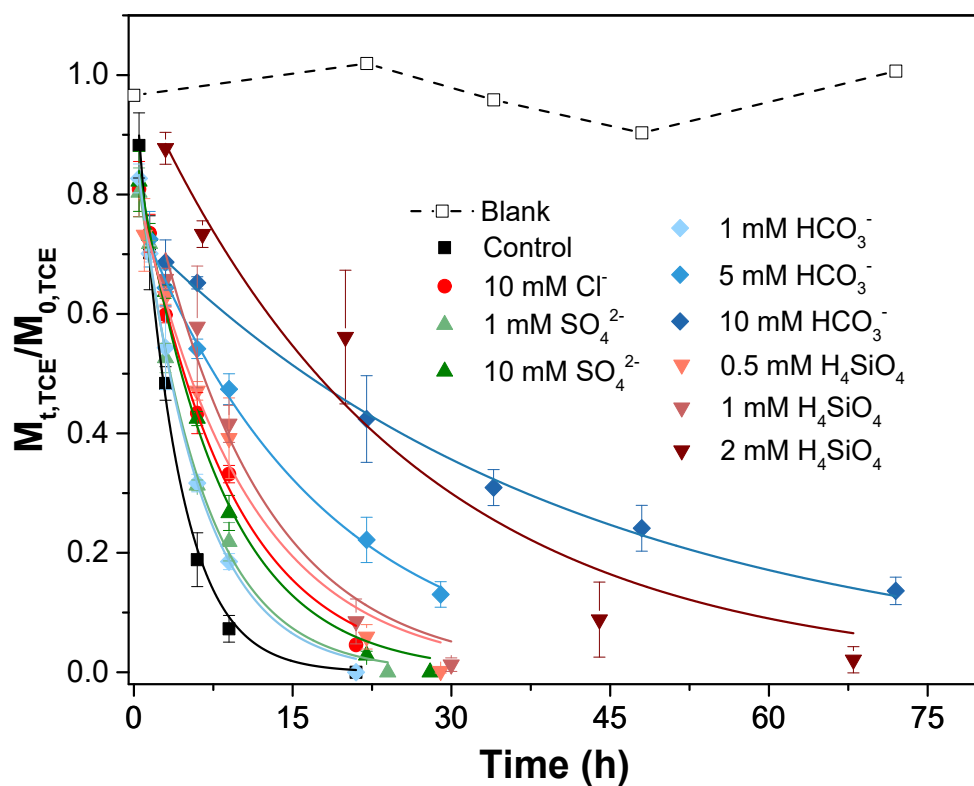

86

87 **Figure S1.** Normalized TCE mass time trends ( $M_{t,TCE}/M_{0,TCE}$ ) in reactions with 23 mM  $[Fe(II)]_{GR}$  and 0.15 g  
 88  $L^{-1}$  BC in the absence and presence of different groundwater solutes at different concentrations. The  
 89 solid lines show pseudo-first-order kinetic fits to the data (but excluding the data at  $t = 0$ ).

90

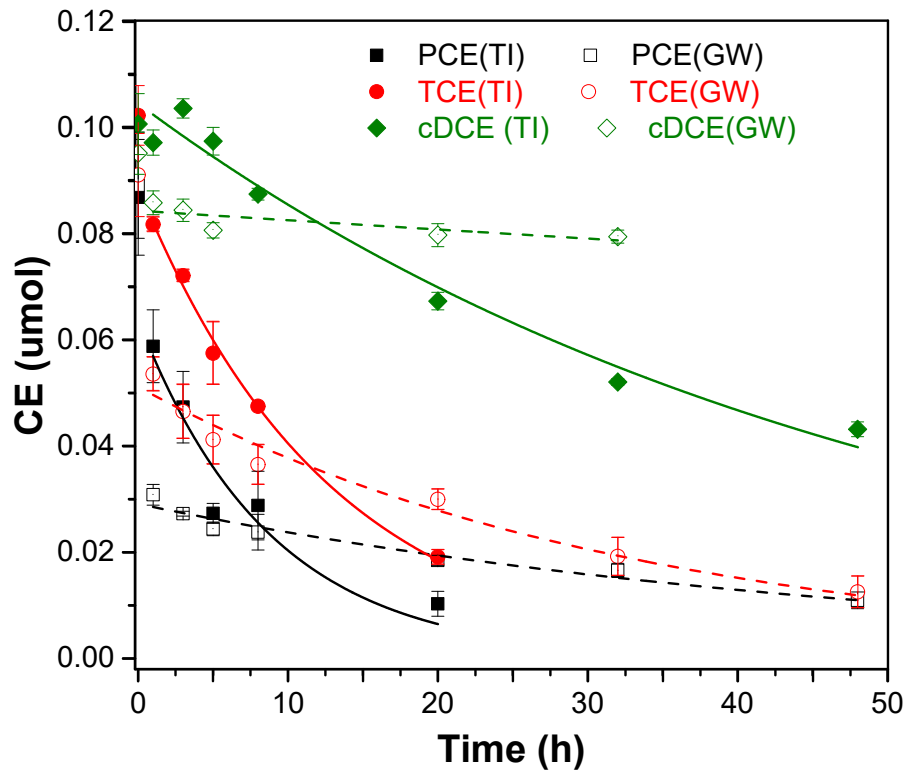

92

93 **Figure S2.** Changes in CE mass as a function of time (h) in TI water (solid symbols) with the GR-BC  
 94 composite (23 mM [Fe(II)]<sub>GR</sub> and 0.15 g L<sup>-1</sup> BC) and in clean groundwater GW-F (open symbols) with the  
 95 GR-BC composite (17 mM [Fe(II)]<sub>GR</sub> and 0.5 g L<sup>-1</sup> BC). Error bars represent one standard deviation  
 96 obtained from triplicate reactions, and the lines shows pseudo-first-order kinetic fits to the data.

97

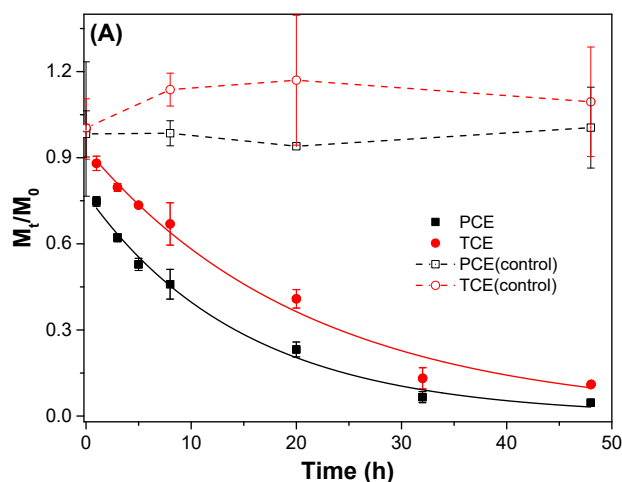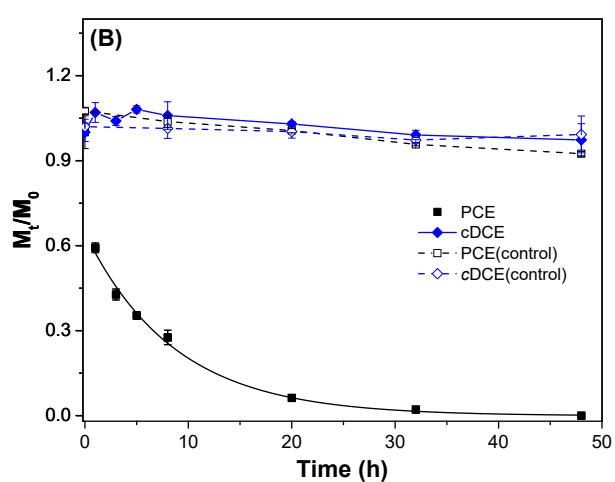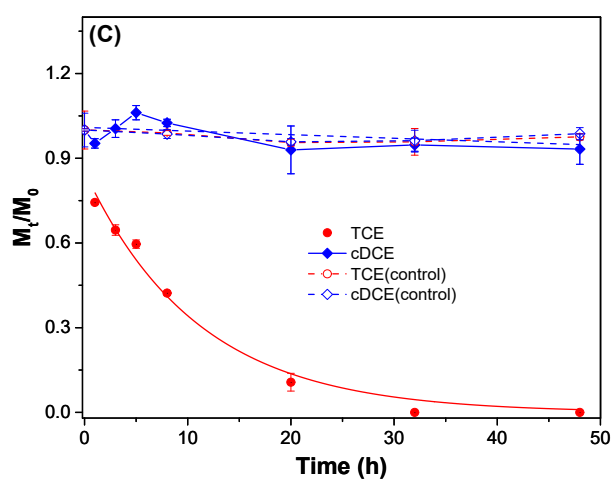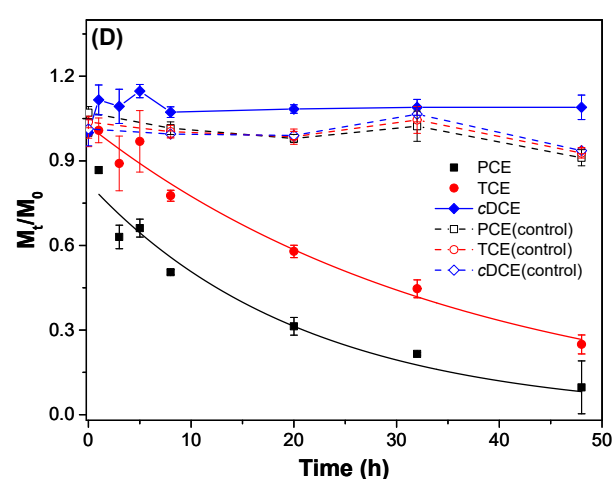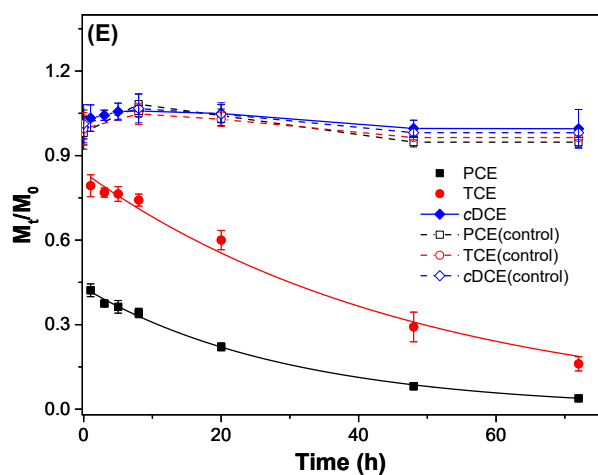

**Figure S3.** Normalized CE mass time trend ( $M_t/M_0$ ) for CE competition experiments in TI water with the GR-BC composite (23 mM  $[\text{Fe(II)}]_{\text{GR}}$  and 0.15 g  $\text{L}^{-1}$  BC) between (A) PCE and TCE, (B) PCE and cDCE, (C) TCE and cDCE, and (D) PCE, TCE and cDCE. (E) Normalized CE mass time trend ( $M_t/M_0$ ) for triple CE competition in clean groundwater GW-F with the GR-BC composite (17 mM  $[\text{Fe(II)}]_{\text{GR}}$  and 0.5 g  $\text{L}^{-1}$  BC).

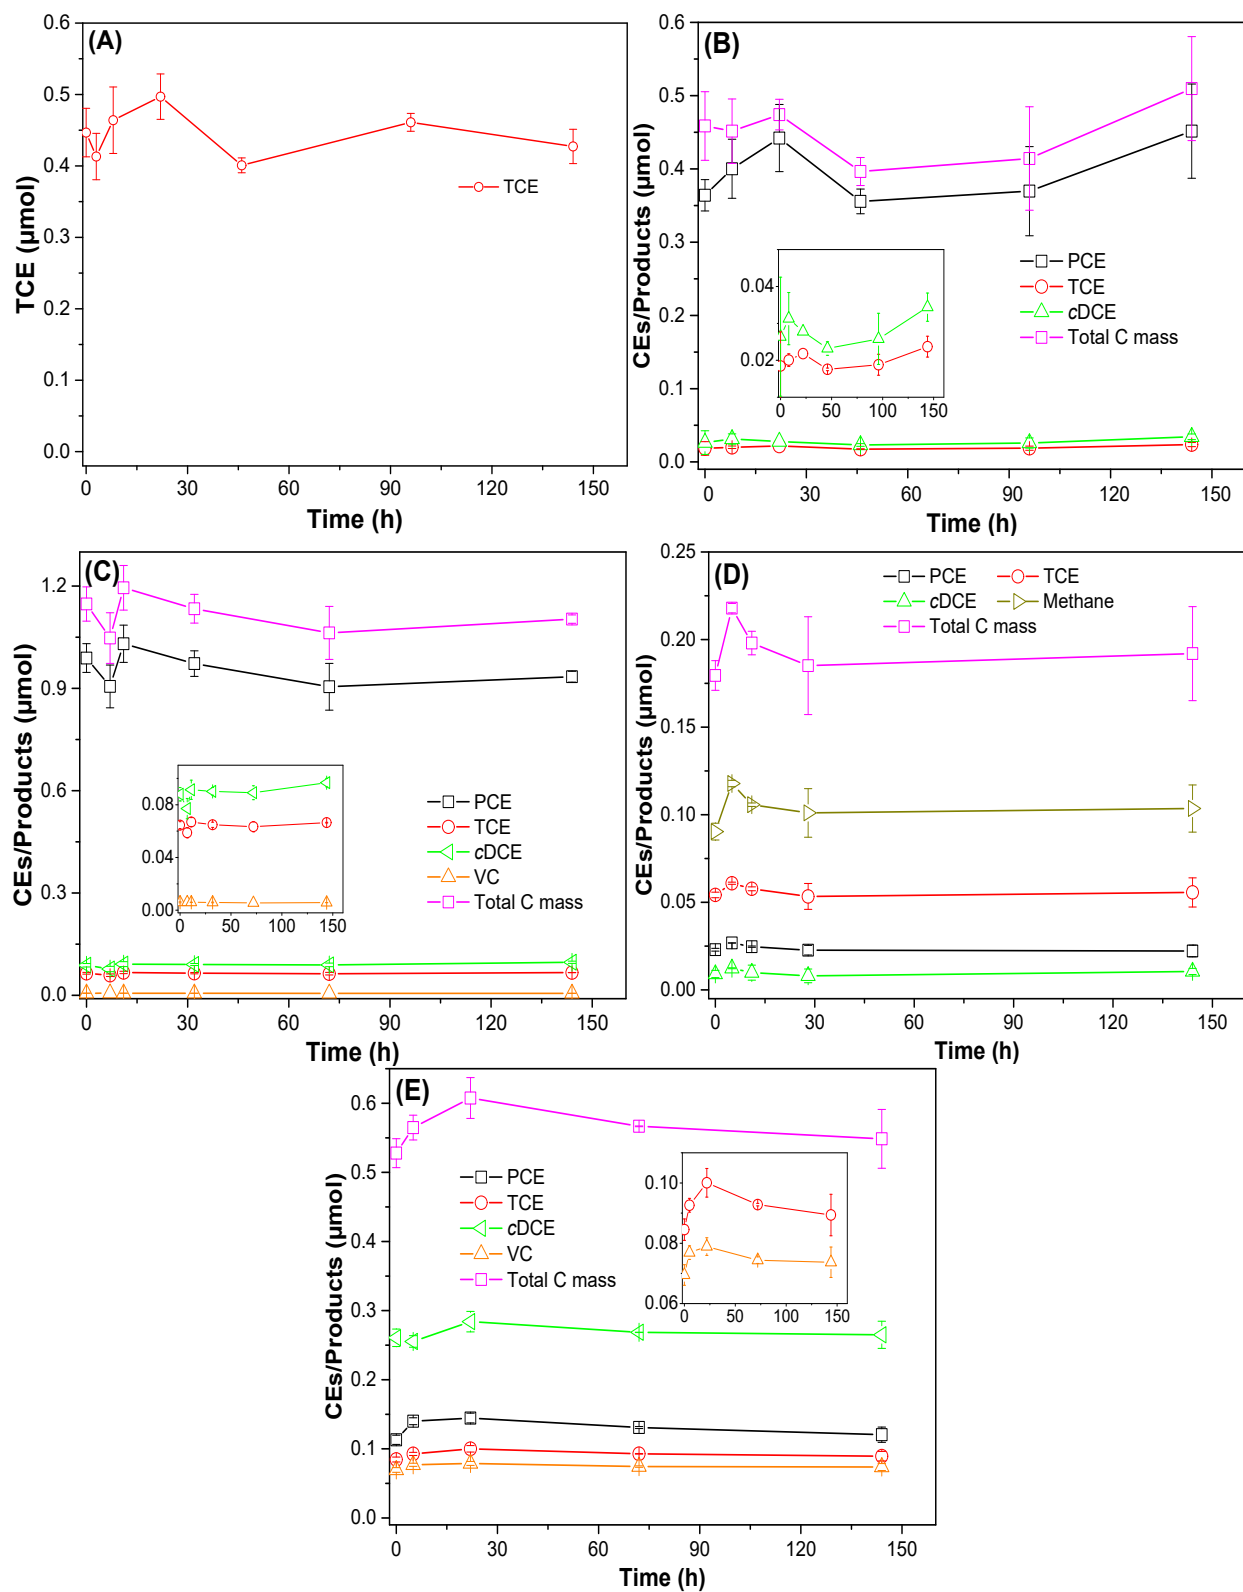

**Figure S4.** Time trends of CE concentrations in control experiments (no added GR-BC mixture) of (A) GW-A, (B) GW-B, (C) GW-C, (D) GW-D, and (E) GW-E.

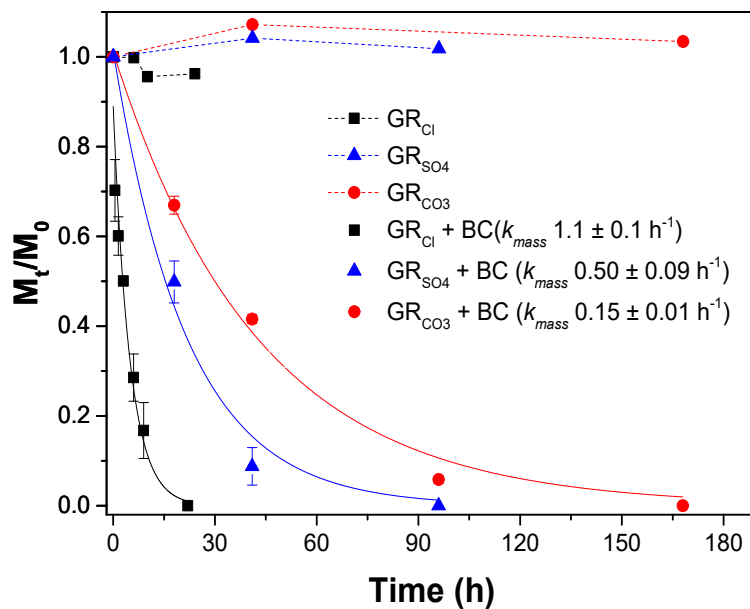

113

114 **Figure S5.** Normalized TCE mass time trends ( $M_t/M_0$ ) in TI water with different GR-BC composite varying  
 115 in GR type, i.e., GR<sub>Cl</sub>, GR<sub>SO4</sub> and GR<sub>CO3</sub>. Solid lines show pseudo-first-order kinetic fits to the data and  
 116 error bars represent one standard deviation from measurement of triplicate samples. The synthesis of  
 117 GR<sub>SO4</sub> and GR<sub>CO3</sub> can be found in Text S1.

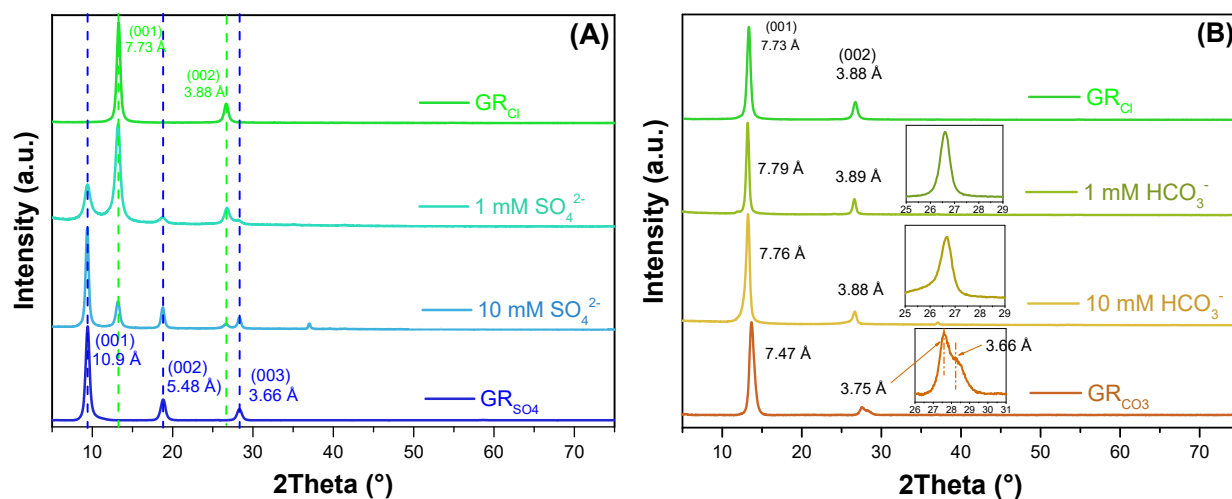

119

120 **Figure S6.** XRD patterns (Co K $\alpha$  radiation) of **(A)** fresh  $\text{GR}_{\text{Cl}}$ ,  $\text{GR}_{\text{Cl}}$  reacted for 24 hours in 1 and 10 mM  
 121  $\text{SO}_4^{2-}$  solutions, and fresh  $\text{GR}_{\text{SO}_4}$ , and **(B)** fresh  $\text{GR}_{\text{Cl}}$ ,  $\text{GR}_{\text{Cl}}$  reacted for 24 hours in 1 and 10 mM  $\text{HCO}_3^-$   
 122 solutions, and fresh  $\text{GR}_{\text{CO}_3}$ . Characteristic peaks of  $\text{GR}_{\text{Cl}}$  and  $\text{GR}_{\text{CO}_3}$  match the reflections of GR1 crystalline  
 123 (ICDD reference code of 00-040-0127 (3) and 00-046-0098 (4)), and those of  $\text{GR}_{\text{SO}_4}$  match the reflections  
 124 of GR2 crystalline (ICDD reference code of 00-013-0090 (5)).

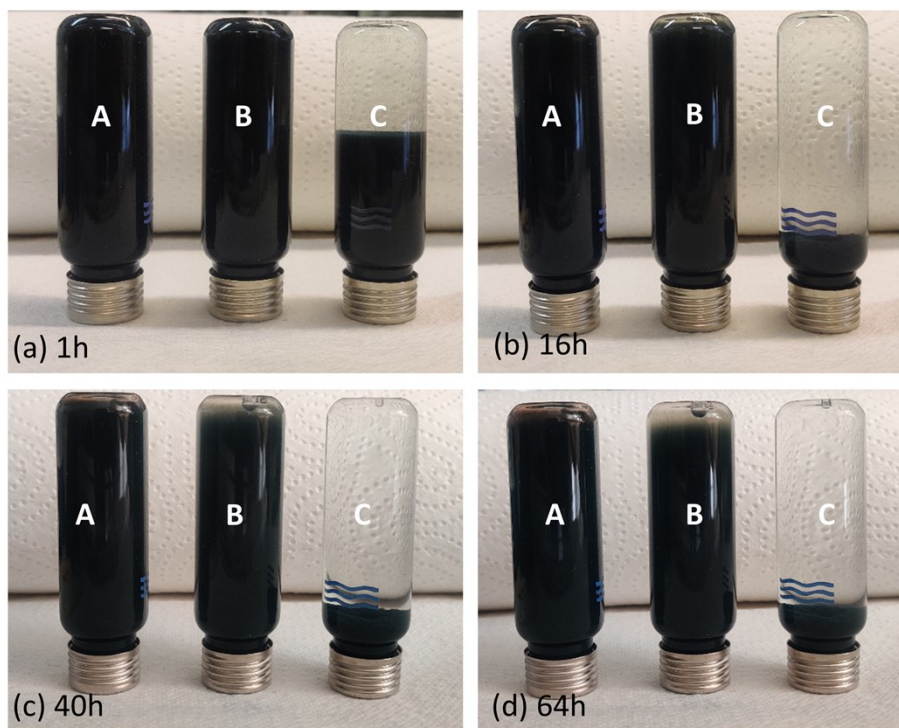

126

127 **Figure S7.** Photos of GR suspensions amended with 0, 0.01 and 0.1 M NaCl (corresponding to A, B and  
 128 C) after settling for **(a)** 1 h, **(b)** 16 h, **(c)** 40 h and **(d)** 64 h. A clear separation of solid and solution was  
 129 seen for GR in 0.1 M NaCl after 1 h, while for GR in 0.01 M NaCl, this separation only became apparent  
 130 after 40 hours. Sedimentation in the NaCl-free GR suspension was lowest and barely visible over the  
 131 monitored time frame.

132

## 134 Reference

- 135 1. Yin W, Huang L, Pedersen EB, Frandsen C, Hansen HCB. Glycine buffered synthesis of layered  
136 iron(II)-iron(III) hydroxides (green rusts). *Journal of Colloid and Interface Science*. 2017 Jul  
137 1;497:429–38.
- 138 2. Ai J, Yin W, B. Hansen HC. Fast Dechlorination of Chlorinated Ethylenes by Green Rust in the  
139 Presence of Bone Char. *Environ Sci Technol Lett*. 2019 Mar 12;6(3):191–6.
- 140 3. Vinš J, Šubrt J, Zapletal V, Hanousek F. Preparation and properties of green rust type substances.  
141 *Collect Czech Chem Commun*. 1987;52(1):93–102.
- 142 4. Hansen HCB. Composition, stabilization, and light absorption of Fe(II)Fe(III) hydroxy-carbonate  
143 ('green rust'). *Clay Minerals*. 1989 Dec;24(4):663–9.
- 144 5. Bernal JD, Dasgupta DR, Mackay AL. The oxides and hydroxides of iron and their structural inter-  
145 relationships [Internet]. 1959. Available from: DOI: <https://doi.org/10.1180/claymin.1959.004.21.02>

146
